# Supplementary material for: Design of High-Performance Polybenzoxazines with Tunable Extended Networks Based on Resveratrol and Allyl Functional Benzoxazine
Source: MDPI journal article supplement (doi:10.3390/polym12122794), 2020-11-26
Supplement: s1 [file s1]

---

## Supporting Information for

# Design of High-Performance Polybenzoxazines with Tunable Extended Networks Based on Resveratrol and Allyl Functional Benzoxazine

Yunliang Xing <sup>1</sup>, Xianru He <sup>1,\*</sup>, Rui Yang <sup>2</sup>, Kan Zhang <sup>2,\*</sup>, Shengfu Yang <sup>3</sup>

<sup>1</sup> School of New Energy and Materials, Southwest Petroleum University, Chengdu 610500, China; Phoebe@coryes.com (Y.X.)

<sup>2</sup> Research School of Polymeric Materials, School of Materials Science and Engineering, Jiangsu University, Zhenjiang 212013, China; yr183346@163.com (R.Y.); zhangkan@ujs.edu.cn (K.Z.)

<sup>3</sup> Department of Chemistry, University of Leicester, Leicester LE1 7RH, United Kingdom; sfy1@le.ac.uk (S.Y.)

\* Correspondence: xrhe@swpu.edu.cn (X.H.); zhangkan@ujs.edu.cn (K. Z.); Tel.: +86-028-83037406 (X.H.); +86-0571-85016616 (K.Z.)

Received: 22 October 2020; Accepted: 24 November 2020; Published: date

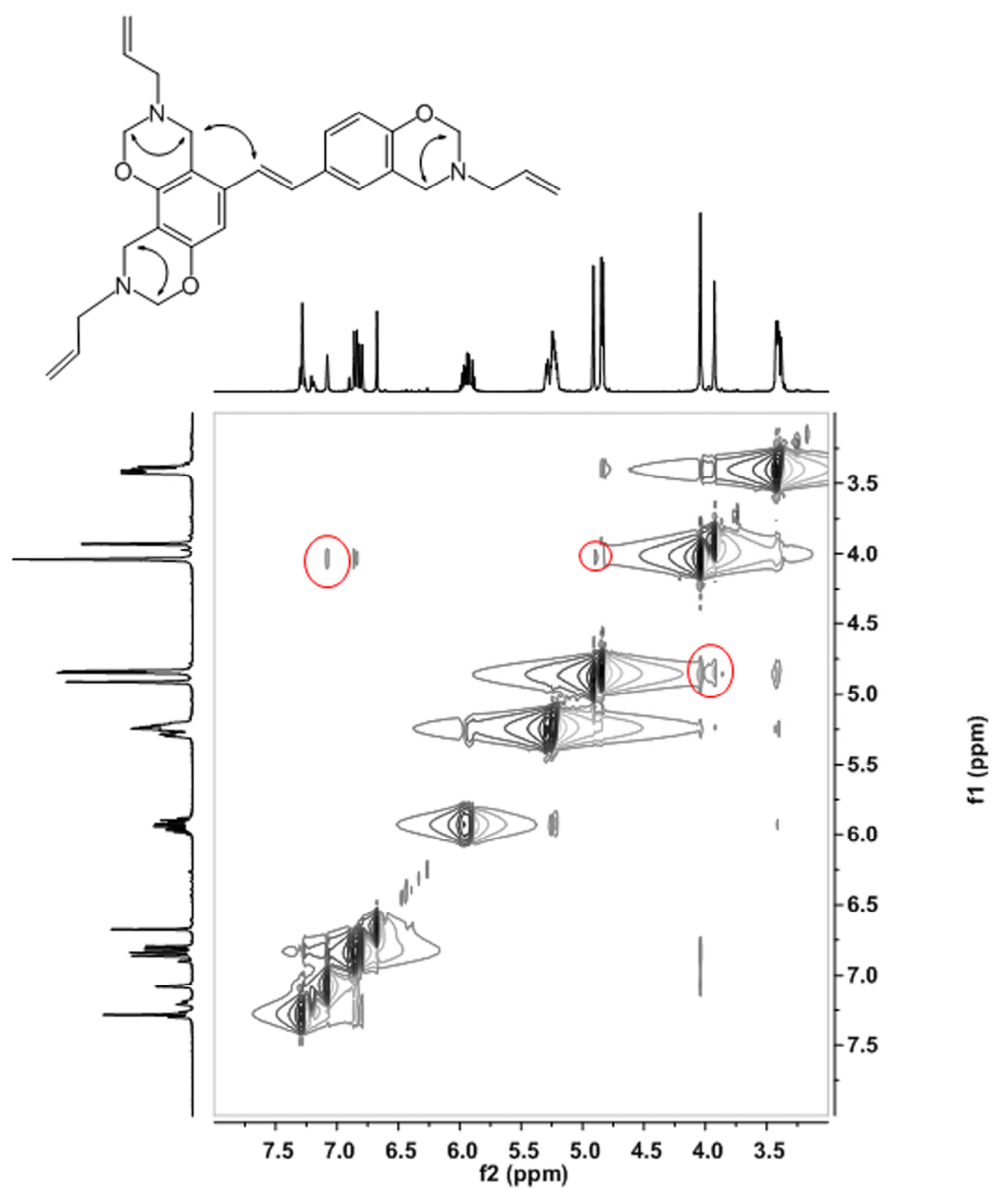

**Figure S1.**  $^1\text{H}$ - $^1\text{H}$  NOESY 2D NMR spectrum of RES-al.

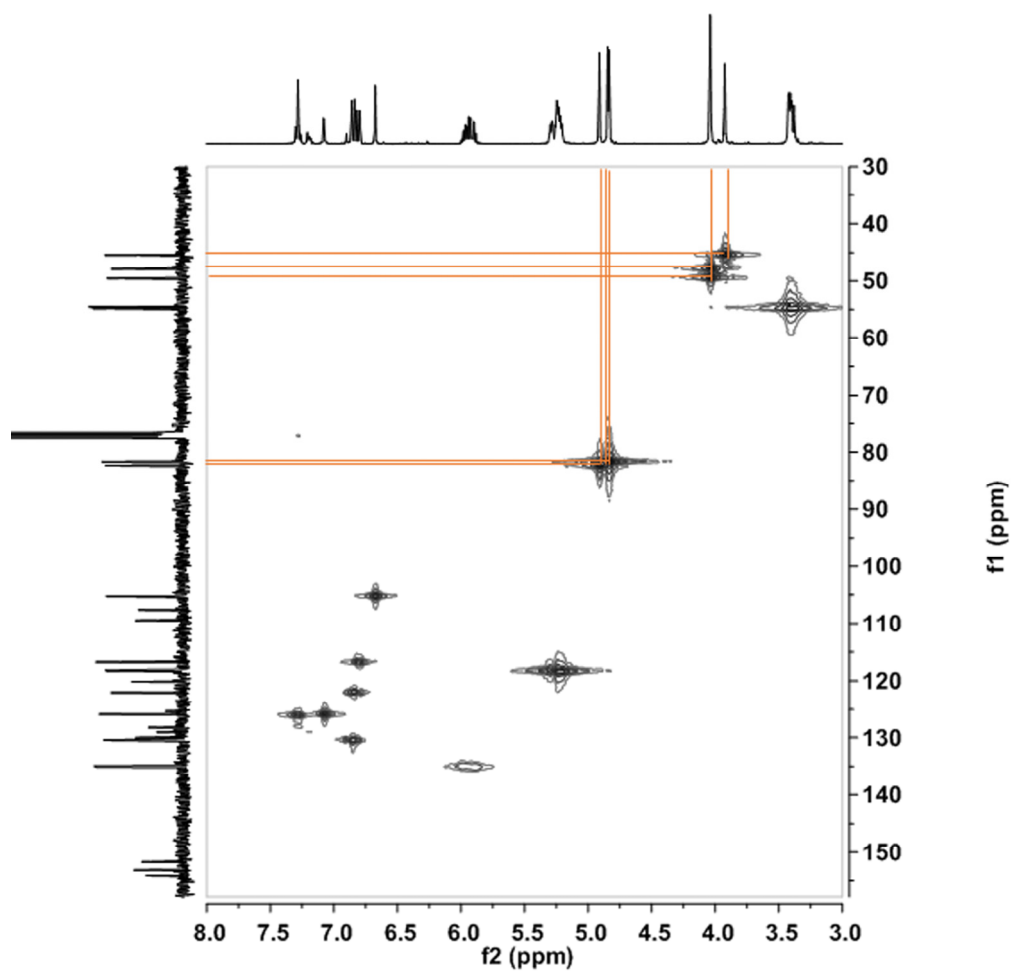

**Figure S2.**  $^1\text{H}$ - $^{13}\text{C}$  HMQC 2D NMR spectrum of RES-al.

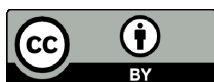

© 2020 by the authors. Licensee MDPI, Basel, Switzerland. This article is an open access article distributed under the terms and conditions of the Creative Commons Attribution (CC BY) license (<http://creativecommons.org/licenses/by/4.0/>).
